# Supplementary material for: Prognostic value of MTA1, SOX4 and EZH2 expression in esophageal squamous cell carcinoma
Source: PubMed Central journal article supplement — Exp Ther Med. 2021 May 3;22(1):722. doi: 10.3892/etm.2021.10154 (PMC8120658; doi:10.3892/etm.2021.10154), 2021-05-03
Supplement: Supplementary_Data.pdf [file Supplementary_Data.pdf]

Table SI. Clinicopathological data of the cohort.

| Characteristic            | Number of patients (%) |
|---------------------------|------------------------|
| Age, years                |                        |
| <60                       | 82 (35.8)              |
| ≥60                       | 147 (64.1)             |
| Sex                       |                        |
| Male                      | 165 (72.0)             |
| Female                    | 64 (27.9)              |
| Ethnicity                 |                        |
| Han                       | 119 (51.9)             |
| Kazakh                    | 110 (48.0)             |
| Tumor size, cm            |                        |
| ≥3                        | 157 (58.5)             |
| <3                        | 72 (31.4)              |
| Tumor location            |                        |
| Upper                     | 12 (5.2)               |
| Middle                    | 139 (60.6)             |
| Lower                     | 78 (34.0)              |
| Lymph node metastasis     |                        |
| No                        | 155 (67.6)             |
| Yes                       | 74 (32.3)              |
| Degree of differentiation |                        |
| Poorly differentiated     | 46 (20.0)              |
| Moderately differentiated | 123 (53.7)             |
| Well differentiated       | 60 (26.2)              |
| Vascular invasion         |                        |
| No                        | 187 (81.6)             |
| Yes                       | 42 (18.3)              |
| Nerve invasion            |                        |
| No                        | 181 (79.0)             |
| Yes                       | 48 (20.9)              |
| Hematogenous metastasis   |                        |
| No                        | 189 (86.4)             |
| Yes                       | 31 (13.5)              |
| Post-radiochemotherapy    |                        |
| No                        | 150 (65.5)             |
| Yes                       | 79 (34.4)              |
| MTA1                      |                        |
| Positive                  | 194 (84.7)             |
| Negative                  | 35 (15.2)              |
| SOX4                      |                        |
| Positive                  | 153 (66.8)             |
| Negative                  | 76 (33.1)              |
| EZH2                      |                        |
| Positive                  | 95 (41.4)              |
| Negative                  | 134 (58.5)             |
| AJCC stage                |                        |
| IA+B                      | 18 (7.8)               |
| IIA+B                     | 143 (62.4)             |
| IIIA+B                    | 47 (20.5)              |
| IVA+B                     | 21 (9.1)               |

AJCC, American Joint Committee on Cancer; EZH2, enhancer of zeste homolog 2; MTA1, metastasis-associated protein 1.
